# Supplementary material
Source: HighWire-hosted journal article supplement (https://bmjopen.bmj.com/content/10/12/e040046)
Supplement: inline-supplementary-material-1 [file inline-supplementary-material-1.pdf]

**TABLE 3** Periodontitis stage – Please see text and appendix A (in online *Journal of Periodontology*) for explanation

| Periodontitis stage     |                                          | Stage I                                                                                                      | Stage II                    | Stage III                                                                                  | Stage IV                                                                                                                                                                                       |
|-------------------------|------------------------------------------|--------------------------------------------------------------------------------------------------------------|-----------------------------|--------------------------------------------------------------------------------------------|------------------------------------------------------------------------------------------------------------------------------------------------------------------------------------------------|
| Severity                | Interdental CAL at site of greatest loss | 1 to 2 mm                                                                                                    | 3 to 4 mm                   | ≥5 mm                                                                                      | ≥5 mm                                                                                                                                                                                          |
|                         | Radiographic bone loss                   | Coronal third (<15%)                                                                                         | Coronal third (15% to 33%)  | Extending to mid-third of root and beyond                                                  | Extending to mid-third of root and beyond                                                                                                                                                      |
|                         | Tooth loss                               | No tooth loss due to periodontitis                                                                           |                             | Tooth loss due to periodontitis of ≤4 teeth                                                | Tooth loss due to periodontitis of ≥5 teeth                                                                                                                                                    |
| Complexity              | Local                                    | Maximum probing depth ≤4 mm                                                                                  | Maximum probing depth ≤5 mm | In addition to stage II complexity:<br>Probing depth ≥6 mm                                 | In addition to stage III complexity:<br>Need for complex rehabilitation due to:                                                                                                                |
|                         |                                          | Mostly horizontal bone loss                                                                                  | Mostly horizontal bone loss | Vertical bone loss ≥3 mm<br>Furcation involvement Class II or III<br>Moderate ridge defect | Masticatory dysfunction<br>Secondary occlusal trauma (tooth mobility degree ≥2)<br>Severe ridge defect<br>Bite collapse, drifting, flaring<br>Less than 20 remaining teeth (10 opposing pairs) |
| Extent and distribution | Add to stage as descriptor               | For each stage, describe extent as localized (<30% of teeth involved), generalized, or molar/incisor pattern |                             |                                                                                            |                                                                                                                                                                                                |

The initial stage should be determined using CAL; if not available then RBL should be used. Information on tooth loss that can be attributed primarily to periodontitis – if available – may modify stage definition. This is the case even in the absence of complexity factors. Complexity factors may shift the stage to a higher level, for example furcation II or III would shift to either stage III or IV irrespective of CAL. The distinction between stage III and stage IV is primarily based on complexity factors. For example, a high level of tooth mobility and/or posterior bite collapse would indicate a stage IV diagnosis. For any given case only some, not all, complexity factors may be present, however, in general it only takes one complexity factor to shift the diagnosis to a higher stage. It should be emphasized that these case definitions are guidelines that should be applied using sound clinical judgment to arrive at the most appropriate clinical diagnosis.

For post-treatment patients CAL and RBL are still the primary stage determinants. If a stage-shifting complexity factor(s) is eliminated by treatment, the stage should not regress to a lower stage since the original stage complexity factor should always be considered in maintenance phase management.

CAL = clinical attachment loss; RBL = radiographic bone loss.

The stages of periodontitis  
doi: 10.1002/JPER.18-0006
